# Supplementary material for: Tuning the size and morphology of zeolitic imidazolate framework-8 in a membrane dispersion reactor
Source: Royal Society of Chemistry journal article supplement (doi:10.1039/c5nj00736d), 2015-01-01
Supplement: c5nj00736d1.pdf [file c5nj00736d1.pdf]

## **Tuning the size and morphology of zeolitic imidazolate framework-8 in a membrane dispersion reactor**

Liangliang Dong<sup>a</sup>, Chunfang Zhang<sup>a</sup>, Jin Gu<sup>a</sup>, Yuping Sun<sup>a</sup>, Yunxiang Bai,<sup>\*a</sup>  
Mingqing Chen,<sup>\*a</sup> and Youyi Xu<sup>b</sup>

<sup>a</sup>The Key Laboratory of Food Colloids and Biotechnology, Ministry of Education,  
School of Chemical and Material Engineering, Jiangnan University, Wuxi 214122,  
Jiangsu, China

<sup>b</sup>MOE Key Laboratory of Macromolecule Synthesis and Functionalization,  
Department of Polymer Science and Engineering, Zhejiang  
University, Hangzhou 310027, P. R. China

---

\* Corresponding author: E-mail address: [baisir223@163.com](mailto:baisir223@163.com), Fax: +86-510-85917763; Tel: +86 510-85917090; E-mail: [mqchen@jiangnan.edu.cn](mailto:mqchen@jiangnan.edu.cn), Fax: +86-510-85917763; Tel: +86-510-85917019.

### Characterization

Scanning electron micrographs of PES ultrafiltration membranes and as-synthesized ZIF-8 were taken with Hitachi S4800 scanning electron microscope (SEM) instrument. X-ray power spectra were recorded using a Bruker D8-Advance diffractometer with Cu-K $\alpha$  radiation. Each XRD pattern was acquired from 3° to 45° at a rate of 1°/min. Nitrogen physisorption isotherms were measured at 77 K on an automatic volumetric adsorption apparatus (ASAP 2020). Dynamic light scattering (DLS) measurements were performed on ALV/DLS/SLS-5022F.

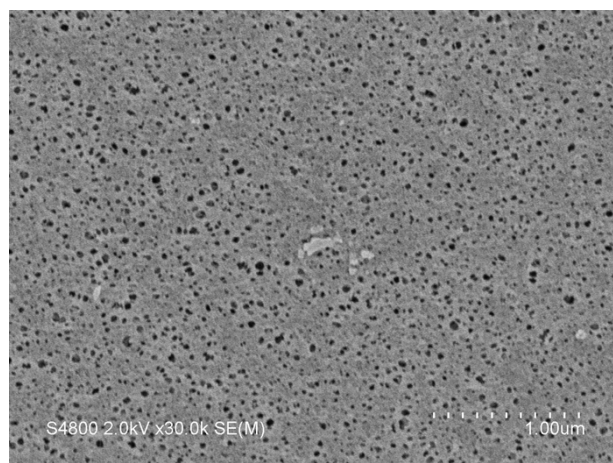

Figure S1. SEM image of the surface of PES membrane. The pore size and thickness of the PES ultrafiltration membrane: 25 nm.

Tab.S1 BET of as-synthesized ZIF-8 prepared by MDR method under different trans-membrane pressure

| Sample | BET Surface Area (m <sup>2</sup> /g) | Langmuir Surface Area (m <sup>2</sup> /g) | t-Plot micropore volume (cm <sup>3</sup> /g) |
|--------|--------------------------------------|-------------------------------------------|----------------------------------------------|
| T 0.02 | 883                                  | 1142                                      | 0.40                                         |
| T 0.04 | 966                                  | 1252                                      | 0.43                                         |
| T 0.06 | 1365                                 | 1790                                      | 0.61                                         |
| T 0.08 | 1146                                 | 1473                                      | 0.51                                         |

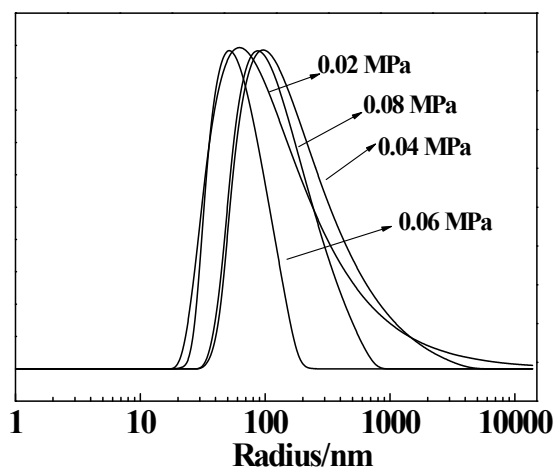

Fig. S2 Size distribution of as-synthesized ZIF-8 prepared by MDR method under different trans-membrane pressure

Table S2 Hydrodynamic radius and hydrodynamic radius distribution of as-synthesized ZIF-8 prepared by MDR method under different trans-membrane pressure

| Sample | hydrodynamic radius /nm | hydrodynamic radius distribution |
|--------|-------------------------|----------------------------------|
| T 0.02 | 92.00                   | 1.132                            |
| T 0.04 | 108.50                  | 0.878                            |
| T 0.06 | 79.80                   | 0.365                            |
| T 0.08 | 98.29                   | 0.696                            |

The size distribution of as-synthesized ZIF-8 under different trans-membrane pressure was shown in Fig. S2 and Table S2. The nanocrystal dispersions were filtered through 0.45  $\mu\text{m}$  syring filters before dynamic light scattering (DLS) measurements. Hydrodynamic radius distributions of ZIF-8 decreased initially and then increased with the increase of trans-membrane pressure. Only at the trans-membrane pressure of 0.06 MPa, ZIF-8 particles with small crystal size ( $\sim 79.8$  nm) and narrow size distribution (hydrodynamic radius distribution was about 0.36) was obtained. Although T 0.02 had small crystal size ( $\sim 92$  nm), it had broad size distribution (hydrodynamic radius distribution was about 1.1).

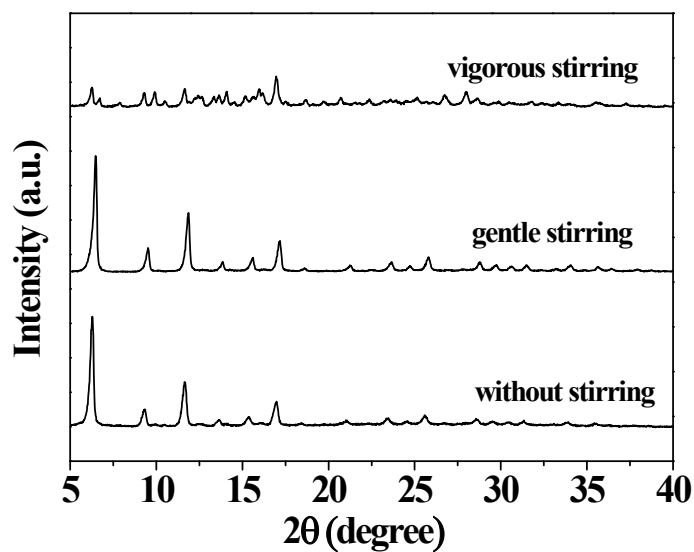

Fig. S3 XRD patterns of as-synthesized ZIF-8 prepared by MDR method under the trans-membrane pressure of 0.06 MPa

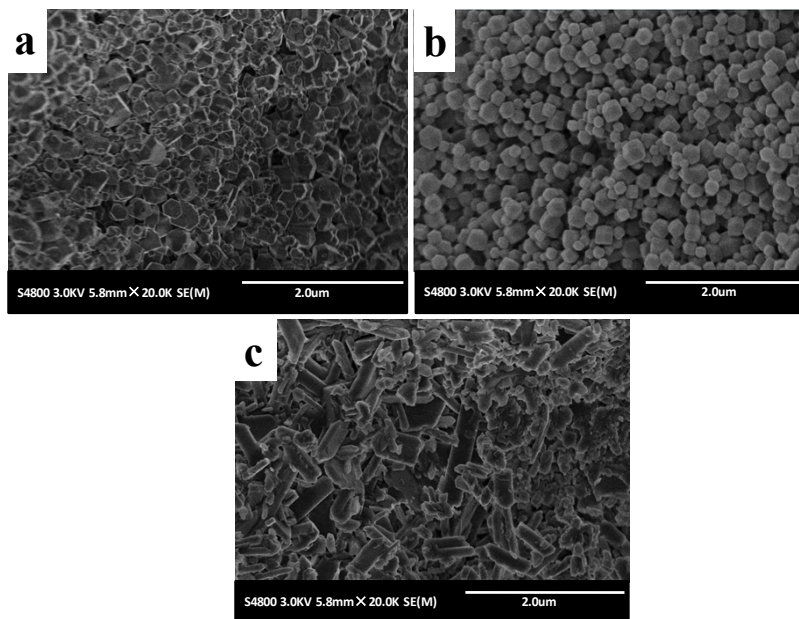

Fig. S4 SEM images of as-synthesized ZIF-8 prepared by MDR method under the trans-membrane pressure of 0.06MPa: (a) without stirring (b) gentle stirring (c) vigorous stirring

Table S3 BET of T 0.06 T 0.06 (a) without stirring (b) gentle stirring (c) vigorous stirring

|   | BET Surface Area<br>(m <sup>2</sup> /g) | Langmuir Surface Area<br>(m <sup>2</sup> /g) | t-Plot micropore<br>volume (cm <sup>3</sup> /g) |
|---|-----------------------------------------|----------------------------------------------|-------------------------------------------------|
| a | 947                                     | 1222                                         | 0.42                                            |
| b | 1365                                    | 1790                                         | 0.61                                            |
| c | 58                                      | 81                                           | 0.02                                            |

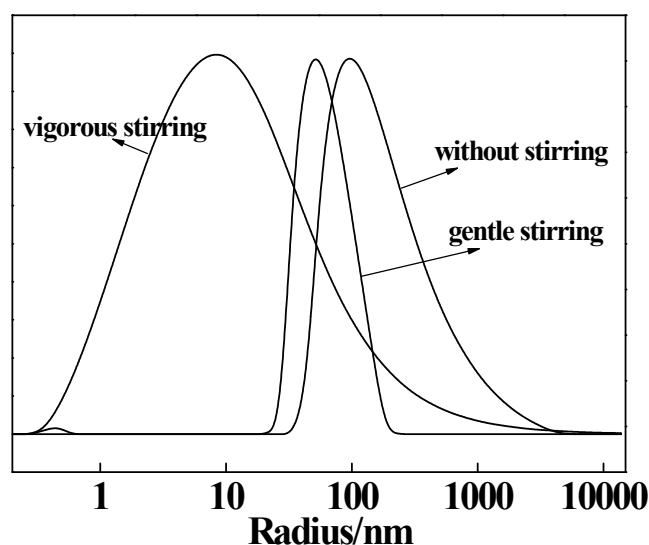

Fig. S5 Size distribution of as-synthesized ZIF-8 prepared by MDR method under the trans-membrane pressure of 0.06Mpa

Table S4 Hydrodynamic radius and hydrodynamic radius distribution of T 0.06 (a) without stirring (b) gentle stirring (c) vigorous stirring

|   | hydrodynamic radius/nm | hydrodynamic radius distribution |
|---|------------------------|----------------------------------|
| a | 122.50                 | 0.898                            |
| b | 79.80                  | 0.365                            |
| c | 11.47                  | 1.556                            |

DLS (Fig. S5 and Table S4) showed that there was broader hydrodynamic radius distribution of ZIF-8 with vigorous stirring than others. The ZIF-8 samples with gentle stirring had the smallest hydrodynamic radius (79.80) and narrow hydrodynamic radius distribution (0.36).
